# Supplementary material
Source: PubMed Central journal article supplement (PMC4442051)
Supplement: NIHMS672022-supplement-1.pdf [file NIHMS672022-supplement-1.pdf]

## **SUPPLEMENTAL MATERIAL**

### **Perivascular Adipose Adiponectin Correlates with Symptom Status of Patients Undergoing Carotid Endarterectomy**

Gaurav Sharma, M.D.<sup>1</sup>; Ming Tao, M.D.<sup>1</sup>; Kui Ding, M.D.<sup>1</sup>; David Yu, B.S.<sup>2</sup>; William King<sup>1</sup>; Galina Deyneko, M.D.<sup>3</sup>; Xiaosong Wang, M.D.<sup>3</sup>; Alban Longchamp, M.D.<sup>1</sup>; Frederick J. Schoen, M.D., Ph.D.<sup>4</sup>; C. Keith Ozaki, M.D.<sup>1</sup>; Marcus E. Semel, M.D., M.P.H.<sup>1</sup>

1. Department of Surgery, Brigham and Women's Hospital/Harvard Medical School, Boston, MA; 2. University of Washington School of Medicine, Seattle, WA; 3. Novartis Institutes for BioMedical Research, Cambridge, MA; 4. Department of Pathology, Brigham and Women's Hospital/Harvard Medical School, Boston, MA

### **Supplemental Methods**

Methods for protein assay from subcutaneous and perivascular adipose tissues have been described previously.<sup>1</sup> At the time of surgery, peripheral blood, subcutaneous adipose tissue (at the site of the cervical incision), and perivascular adipose tissue (contiguous to the adventitia of the diseased common and internal carotid arteries) of patients undergoing carotid endarterectomy (CEA) were obtained by six participating surgeons who had been briefed on the standardized sampling techniques. Fifteen milliliters of peripheral blood were obtained at the time of peripheral intravenous line placement and plasma was isolated by centrifugation for 15 minutes at 2000g at room temperature. Surgeons performing the carotid endarterectomy collected 50 to 500 milligrams of adipose tissue from each of two locations: (1) subcutaneous tissue at the site of neck incision, and (2) perivascular tissue contiguous to the adventitia of diseased segments of the operative carotid artery. All samples were immediately flash frozen in liquid nitrogen then stored at -80°C until the time of analysis. Proteins were isolated from the samples using ice-cold Dulbecco's phosphate-buffered saline with protease inhibitor cocktail (Roche Applied Science, Indianapolis, IN). This solution was then homogenized and centrifuged (2,000g x 5 minutes) to remove gross debris. Homogenates were again centrifuged (10,000g x 10 minutes). The supernatant was then collected for quantitative protein analysis using a Luminex multiple antigen flow microparticle bead assay (Luminex Corporation, Austin, TX). Based on previous literature, nine key biologic mediators were assayed: adiponectin, interleukin (IL)-1 $\beta$ , IL-6, IL-8, leptin, monocyte chemoattractant protein (MCP)-1, plasminogen activator inhibitor (PAI)-1, resistin, and tumor necrosis factor (TNF).<sup>2-20</sup> Quantities were adjusted by the total volume of each sample.

## Supplemental Tables and Figures

**Supplemental table I.** Perivascular adipose tissue protein levels in patients with asymptomatic and symptomatic carotid artery stenosis.

| <i>Protein</i>               | <i>Asymptomatic (n=19)</i>         | <i>Symptomatic (n=15)</i>          | <i>P-value</i> |
|------------------------------|------------------------------------|------------------------------------|----------------|
| Adiponectin, pg/ml [Q1,Q3]   | 251908.70<br>[212749.00,365392.00] | 478445.50<br>[315447.00,603897.00] | <b>0.005</b>   |
| IL-1 $\beta$ , pg/ml [Q1,Q3] | 0.33 [0.19,0.42]                   | 0.47 [0.33,0.77]                   | <b>0.015</b>   |
| IL-6, pg/ml [Q1,Q3]          | 8.56 [2.02,35.06]                  | 14.39 [4.45,33.91]                 | 0.68           |
| IL-8, pg/ml [Q1,Q3]          | 9.52 [3.57,25.03]                  | 6.92 [4.63,25.12]                  | 0.81           |
| Leptin, pg/ml [Q1,Q3]        | 470.29<br>[353.70,1009.52]         | 549.96 [376.10,940.69]             | 0.75           |
| MCP-1, pg/ml [Q1,Q3]         | 146.31 [76.48,331.81]              | 170.33 [99.87,369.96]              | 0.47           |
| PAI-1, pg/ml [Q1,Q3]         | 193.28 [97.40,564.58]              | 150.23 [102.73,327.21]             | 0.45           |
| Resistin, pg/ml [Q1,Q3]      | 22351.51<br>[11800.63,42900.90]    | 24379.73<br>[12545.36,29878.99]    | 0.78           |
| TNF, pg/ml [Q1,Q3]           | 0.91 [0.75,1.30]                   | 0.96 [0.78,3.83]                   | 0.31           |

*Q1*, 25% quartile; *Q3*, 75% quartile; *IL-1 $\beta$* , interleukin-1 beta; *IL-6*, interleukin-6; *IL-8*, interleukin-8; *MCP-1*, monocyte chemoattractant protein-1; *PAI-1*, plasminogen activator inhibitor-1; *TNF*, tumor necrosis factor

**Supplemental table II.** Plasma protein levels in patients with asymptomatic and symptomatic carotid artery stenosis.

| <i>Protein</i>               | <i>Asymptomatic (n=19)</i>      | <i>Symptomatic (n=15)</i>       | <i>P-value</i> |
|------------------------------|---------------------------------|---------------------------------|----------------|
| Adiponectin,pg/ml [Q1,Q3]    | 10452329<br>[6685570,12945900]  | 10845269<br>[6792411,22397723]  | 0.31           |
| IL-1 $\beta$ , pg/ml [Q1,Q3] | 0.43 [0.27,1.0]                 | 0.16 [0.00, 0.34]               | <b>0.008</b>   |
| IL-6, pg/ml [Q1,Q3]          | 4.38 [2.62,9.99]                | 3.24 [1.17,5.63]                | 0.17           |
| IL-8, pg/ml [Q1,Q3]          | 5.07 [4.34,9.11]                | 4.68 [4.05,6.39]                | 0.45           |
| Leptin, pg/ml [Q1,Q3]        | 18861.77<br>[12322.57,26225.14] | 10839.31<br>[5147.19,20155.25]  | 0.77           |
| MCP-1, pg/ml [Q1,Q3]         | 116.76<br>[91.73,205.39]        | 104.43 [92.05,144.83]           | 0.39           |
| PAI-1, pg/ml [Q1,Q3]         | 24020.40<br>[19035.50,30109.30] | 24994.83<br>[17196.20,27649.40] | 0.68           |
| Resistin, pg/ml [Q1,Q3]      | 29733.15<br>[20704.90,36079.70] | 27822.40<br>[20228.50,32572.90] | >0.99          |
| TNF, pg/ml [Q1,Q3]           | 3.26 [2.82,5.81]                | 3.32 [2.64,4.95]                | 0.92           |

*Q1*, 25% quartile; *Q3*, 75% quartile; *IL-1 $\beta$* , interleukin-1 beta; *IL-6*, interleukin-6; *IL-8*, interleukin-8; *MCP-1*, monocyte chemoattractant protein-1; *PAI-1*, plasminogen activator inhibitor-1; *TNF* tumor necrosis factor

**Supplemental table III.** Subcutaneous adipose tissue protein levels in patients with asymptomatic and symptomatic carotid artery stenosis.

| <i>Variable</i>              | <i>Asymptomatic (n=19)</i>       | <i>Symptomatic (n=15)</i>        | <i>P-value</i> |
|------------------------------|----------------------------------|----------------------------------|----------------|
| Adiponectin, pg/ml [Q1,Q3]   | 428061.10 [251057.00,1065337.00] | 661021.00 [551276.00,1226455.00] | <b>0.04</b>    |
| IL-1 $\beta$ , pg/ml [Q1,Q3] | 0.41 [0.31,0.45]                 | 0.45 [0.37,0.48]                 | 0.35           |
| IL-6, pg/ml [Q1,Q3]          | 2.15 [1.70,22.50]                | 2.61 [1.82,7.68]                 | 0.81           |
| IL-8, pg/ml [Q1,Q3]          | 9.31 [4.62,23.23]                | 7.15 [3.62,11.16]                | 0.19           |
| Leptin, pg/ml [Q1,Q3]        | 513.41 [329.96,725.18]           | 544.96 [234.01,1069.47]          | >0.99          |
| MCP-1, pg/ml [Q1,Q3]         | 147.54 [64.35,171.86]            | 95.12 [54.18,168.89]             | 0.30           |
| PAI-1, pg/ml [Q1,Q3]         | 193.66 [142.32,281.30]           | 96.81 [62.46,185.27]             | <b>0.01</b>    |
| Resistin, pg/ml [Q1,Q3]      | 17291.50 [11911.40,34623.52]     | 16271.41 [13223.43,38649.57]     | 0.92           |
| TNF, pg/ml [Q1,Q3]           | 0.22 [0.17,0.32]                 | 0.25 [0.16,0.34]                 | 0.88           |

*Q1*, 25% quartile; *Q3*, 75% quartile; *IL-1 $\beta$* , interleukin-1 beta; *IL-6*, interleukin-6; *IL-8*, interleukin-8; *MCP-1*, monocyte chemoattractant protein-1; *PAI-1*, plasminogen activator inhibitor-1; *TNF*, tumor necrosis factor

**Supplemental table IV.** Univariate analysis of pathologic characteristics of carotid endarterectomy plaques and symptomatic status.

|                   |        | <i>Asymptomatic (n=19)</i> | <i>Symptomatic (n=15)</i> | <i>P value</i> |
|-------------------|--------|----------------------------|---------------------------|----------------|
| Necrotic core     | None   | 3                          | 2                         | 0.95           |
|                   | <15%   | 2                          | 2                         |                |
|                   | 15-30% | 4                          | 2                         |                |
|                   | >30%   | 10                         | 9                         |                |
| Lesion cap        | Yes    | 7                          | 5                         | >0.99          |
|                   | No     | 12                         | 10                        |                |
| Revascularization | Yes    | 6                          | 5                         | >0.99          |

|                          |                      |    |    |       |
|--------------------------|----------------------|----|----|-------|
|                          | No                   | 11 | 10 |       |
| Acute plaque hemorrhage  | (-)                  | 16 | 14 |       |
|                          | (+/-)                | 1  | 0  | >0.99 |
|                          | (+)                  | 1  | 0  |       |
|                          | (++)                 | 1  | 1  |       |
|                          | Yes                  | 3  | 3  | >0.99 |
| Calcification            | No                   | 16 | 12 |       |
| Macrophage content grade | <15%                 | 1  | 1  |       |
|                          | 15-30%               | 9  | 7  | >0.99 |
|                          | 31-50%               | 7  | 5  |       |
|                          | >50%                 | 2  | 2  |       |
|                          | Intimal thickening   | 0  | 0  |       |
| Atherosclerosis stage    | Early atheroma       | 0  | 0  | >0.99 |
|                          | Fibroatheroma        | 3  | 3  |       |
|                          | Complicated atheroma | 16 | 12 |       |

### Supplemental References

1. Mauro CR, Nguyen BT, Yu P, Tao M, Gao I, Seidman MA, et al. Inflammatory “adiposopathy” in major amputation patients. *Ann Vasc Surg.* 2013;27:346-52.
2. Apostolopoulos J, Davenport P, Tipping PG. Interleukin-8 Production by Macrophages From Atheromatous Plaques. *Arterioscler Thromb Vasc Biol.* 1996; 16: 1007-1012.
3. Eitzman DT, Westrick RJ, Xu Zuojun, Tyson J, Ginsburg D. Plasminogen activator inhibitor-1 deficiency protects against atherosclerosis progression in the mouse carotid artery. *Blood.* 2000;96: 4212-4215.
4. Hasenstab D, Lea H, Clowes AW. Local Plasminogen Activator Inhibitor Type 1 Overexpression in Rat Carotid Artery Enhances Thrombosis and Endothelial Regeneration While Inhibiting Intimal Thickening. *Arterioscler Thromb Vasc Biol.* 2000;20:853-859
5. Lee SH, Jeong MH, Bae HR, Jeong SJ, Jang JY, Lim YJ, et al. Circulating levels of interleukin-8 and vascular endothelial growth factor in patients with carotid stenosis. *Korean Med Sci.* 2001;16:198-203.

6. Reilly MP, Lehrke M, Wolfe ML, Rohatgi A, Lazar MA, Rader DJ. Resistin Is an Inflammatory Marker of Atherosclerosis in Humans. *Circulation*. 2005;111:932-939.
7. Beltowski J. Leptin and atherosclerosis. *Atherosclerosis*. 2006;189:47–60.
8. Peng Y, Liu H, Liu F, Ouyang L, Cheng M, Gao L, et al. Atherosclerosis is associated with plasminogen activator inhibitor type-1 in chronic haemodialysis patients. *Nephrology*. 2008;13:579-86
9. Shin HJ, Park S, Yoon SJ, Choi DS, Cho DK, Kim JS, et al. Association between serum resistin and carotid intima media thickness in hypertension patients. *International Journal of Cardiology*. 2008;125:79–84.
10. Chamberlain J, Francis S, Brookes Z, Shaw G, Graham D, et al. Interleukin-1 Regulates Multiple Atherogenic Mechanisms in Response to Fat Feeding. *PLoS ONE*. 2009;4:e5073.
11. McKellar GE, McCarey DW, Sattar N, McInnes IB. Role for TNF in atherosclerosis? Lessons from autoimmune disease. *Nature Reviews Cardiology*. 2009;6:410-7.
12. Yuasa S, Maruyama T, Yamamoto Y, Hirose H, Kawai T, Matsunaga-Irie S, et al. MCP-1 gene A-2518G polymorphism and carotid artery atherosclerosis in patients with type 2 diabetes. *Diabetes Res Clin Pract*. 2009;86:193-8.
13. Barseghian A, Gawande D, Bajaj M. Adiponectin and Vulnerable Atherosclerotic Plaques. *J Am Coll Cardiol* 2011;57:761–70.
14. Gardener H, Sjoberg C, Crisby M, Goldberg M, Mendez A, Wright CB, et al. Adiponectin and Carotid Intima-Media Thickness in the Northern Manhattan Study. *Stroke*. 2012;43:1123-1125.
15. Schneiderman J, Schaefer K, Kolodgie FD, Savion N, Kotev-Emeth S, Dardik R, et al. Leptin Locally Synthesized in Carotid Atherosclerotic Plaques Could Be Associated With Lesion Instability and Cerebral Emboli. *J Am Heart Assoc*. 2012;1:e001727.
16. Rubio-Guerra AF, Cabrera-Miranda LJ, Vargas-Robles H, Maceda-Serrano A, Lozano-Nuevo JJ, Escalante-Acosta BA. Correlation between levels of circulating adipokines and adiponectin/resistin index with carotid intima-media thickness in hypertensive type 2 diabetic patients. *Cardiology*. 2013;125:150-3.
17. Schroeter MR, Eschholz N, Herzberg S, Jerchel I, Leifheit-Nestler M, Czepluch FS, et al. Leptin-dependent and leptin-independent paracrine effects of perivascular adipose tissue on neointima formation. *Arterioscler Thromb Vasc Biol*. 2013;33:980-7.
18. Kadoglou NPE, Lambadiari V, Gastounioti A, Gkekas C, Giannakopoulos TG, Koulia K, et al. The relationship of novel adipokines, RBP4 and omentin-1, with carotid atherosclerosis severity and vulnerability. *Atheroscl*. 2014;235:606-12.
19. Manka D, Chatterjee TK, Stoll LL, Basford JE, Konaniah ES, Srinivasan R, et al. Transplanted perivascular adipose tissue accelerates injury-induced neointimal hyperplasia: role of monocyte chemoattractant protein-1. *Arterioscler Thromb Vasc Biol*. 2014;34:1723-30.
20. Withers SB, Bussey CE, Saxton SN, Melrose HM, Watkins AE, Heagerty AM. Mechanisms of adiponectin-associated perivascular function in vascular disease. *Arterioscler Thromb Vasc Biol*. 2014;34:1637-42.
